# Supplementary material for: Preparation, Characterisation, and Topical Delivery of Terbinafine
Source: MDPI journal article supplement (doi:10.3390/pharmaceutics11100548), 2019-10-22
Supplement: s1 [file s1]

# Supplementary Materials: Preparation, Characterisation, and Topical Delivery of Terbinafine

A.S.M. Monjur Al Hossain, Bruno C. Sil, Fotis Iliopoulos, Rebecca Lever, Jonathan Hadgraft and Majella E. Lane

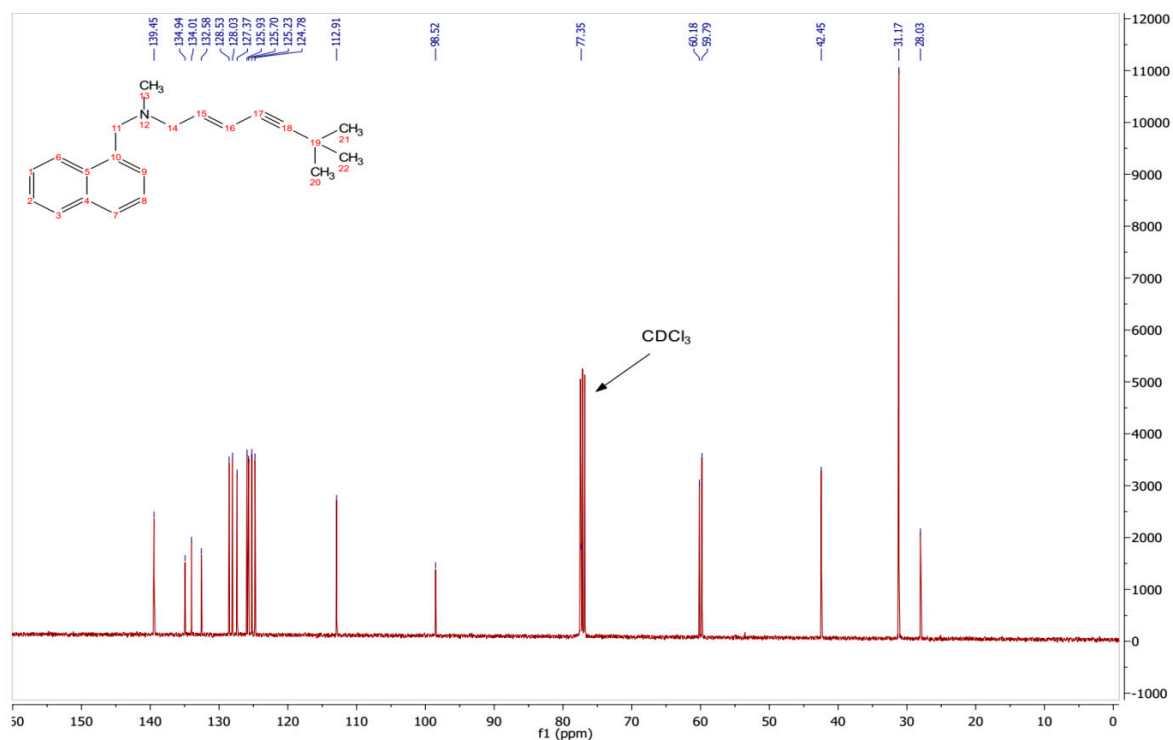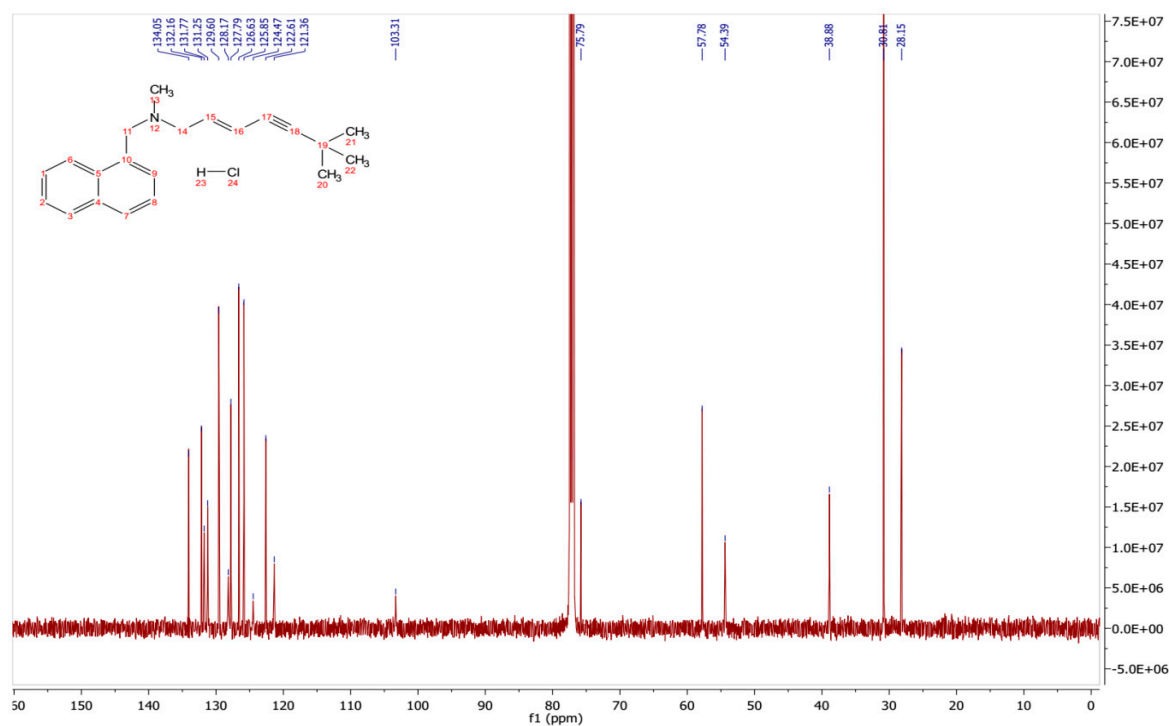

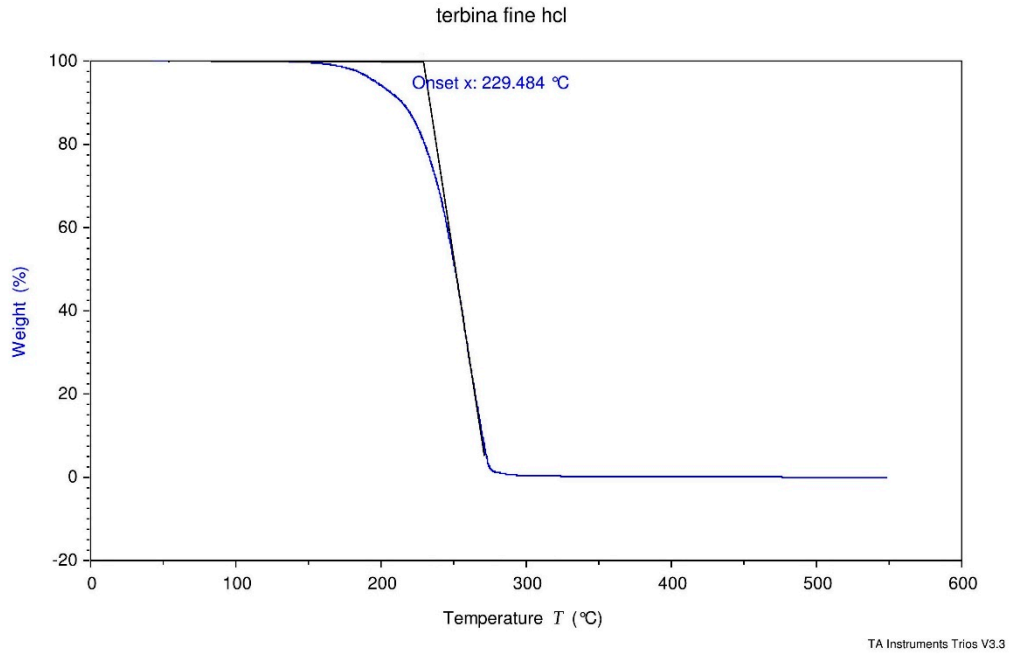

(a)

Sample: tbf hcl comm  
Size: 5.9300 mg

DSC

File: C:\...Monjur\tbf hcl com 02.001  
Operator: monjur  
Run Date: 03-Feb-2017 15:56  
Instrument: DSC Q2000 V24.11 Build 124

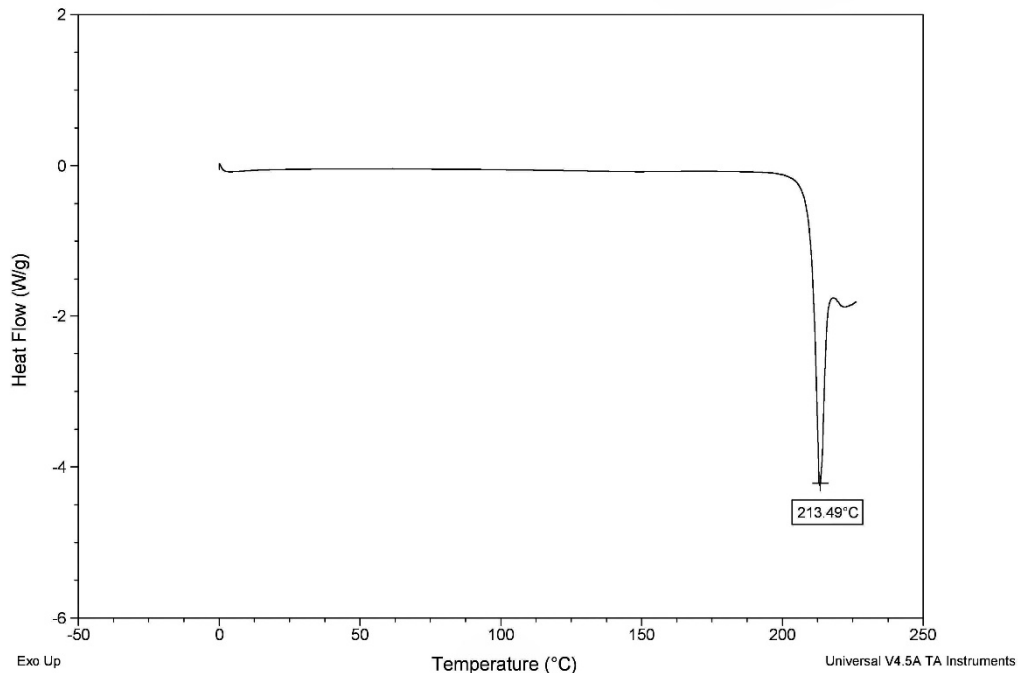

(b)

Figure S3. TGA (a) and DSC (b) analysis of TBF salt.

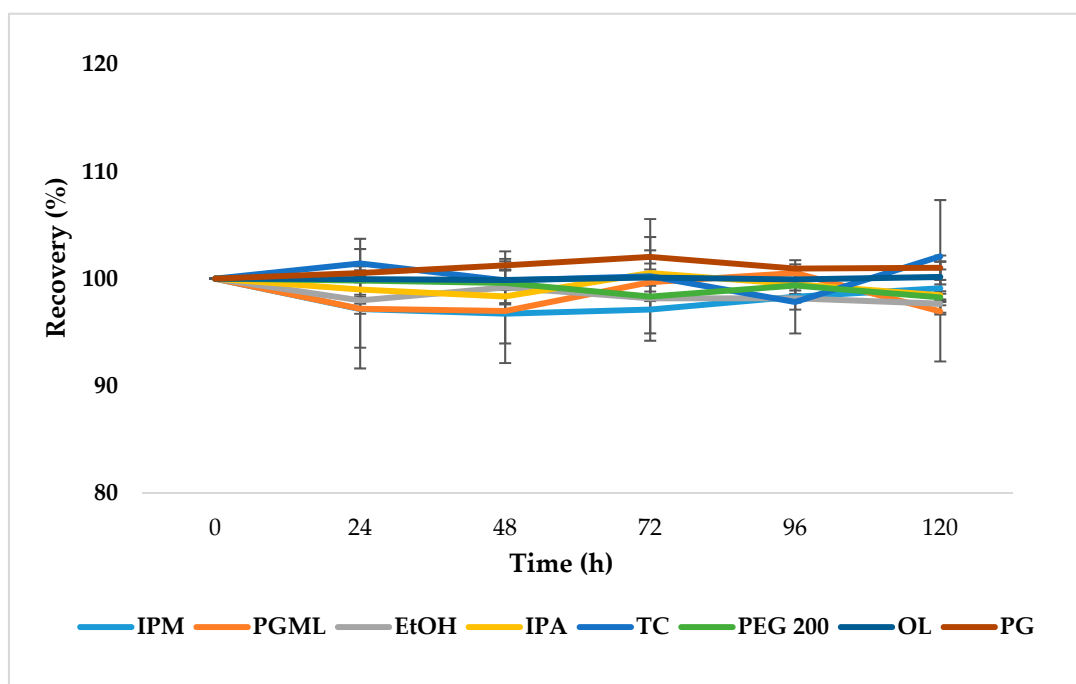

**Figure S4.** Recovery (%) of TBF-free base in a series of solvent systems after 24, 48, 72, 96 and 120 h at  $32 \pm 1^\circ\text{C}$  ( $n = 3$ ; mean  $\pm$  SD).

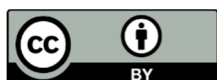

© 2019 by the authors. Submitted for possible open access publication under the terms and conditions of the Creative Commons Attribution (CC BY) license (<http://creativecommons.org/licenses/by/4.0/>).
